# Supplementary material
Source: Elsevier journal article supplement (https://www.sciencedirect.com/science/article/pii/S2387020620304654)
Supplement: mmc1 [file S2387020620304654:mmc1.docx]

**Apéndices. Tabla A.**

**Características sociodemográficas y clínicas. Distribución de las defunciones en cada categoría.**

|  |  |  |  | **defunciones** | |
| --- | --- | --- | --- | --- | --- |
| **Grupos** | **Categorías** | **N** | **%**1 | N | %1 |
| **Variables socio-demográficas** | Varones | 131 | 55.0 | 38 | 29.0 |
| Mujeres | 107 | 45.0 | 23 | 21.5 |
| Grupos de edad: 30-39 años | 13 | 5.5 | 0 | 0 |
| 40-49 años | 29 | 12.2 | 0 | 0 |
| 50-59 años | 52 | 21.9 | 3 | 5.8 |
| 60-69 años | 47 | 19.8 | 6 | 12.8 |
| 70-79 años | 49 | 20.6 | 14 | 28.6 |
| > 79 años | 48 | 20.2 | 38 | 79.2 |
| Viven en residencia  No viven en residencia | 26  212 | 10.9  89.1 | 21  40 | 80.8  18.9 |
| **Consumo de tabaco** | No fumador | 134 | 56.3 | 29 | 21.6 |
| Fumador | 22 | 9.2 | 3 | 13.6 |
| Exfumador | 40 | 16.8 | 13 | 32.5 |
|  | Desconocido | 42 | 17.6 | 16 | 38.1 |
| **Comorbilidades** | Alguna comorbilidad | 135 | 56.7 | 55 | 40.7 |
| HTA | 116 | 48.7 | 47 | 40.5 |
| DM | 52 | 21.9 | 27 | 51.2 |
| ECV | 54 | 22.7 | 36 | 66.7 |
| Neumopatía previa | 50 | 21.0 | 22 | 44.0 |
| Insuficiencia renal crónica | 23 | 9.7 | 15 | 65.2 |
| Neoplasia activa | 8 | 3.4 | 3 | 37.5 |
| Polimedicación | 77 | 32.4 | 39 | 50.7 |
| Dependiente ABVD | 47 | 19.8 | 37 | 78.7 |
| **Clínica** | Fiebre/febrícula | 213 | 89.5 | 49 | 23.0 |
| Tos | 192 | 80.7 | 52 | 27.1 |
| Malestar general | 151 | 63.5 | 42 | 27.8 |
| Cansancio y astenia | 141 | 59.2 | 32 | 22.7 |
| Disnea | 146 | 61.3 | 43 | 29.5 |
| Mialgias | 105 | 44.1 | 15 | 14.3 |
| Ageusia | 55 | 23.1 | 1 | 1.8 |
| Anosmia | 48 | 20.2 | 2 | 4.2 |
| Diarrea | 70 | 29.4 | 8 | 11.4 |
| Expectoración | 62 | 26.1 | 16 | 25.8 |
| Náuseas | 55 | 23.1 | 7 | 12.7 |
| Cefalea | 48 | 20.2 | 4 | 8.3 |
| Odinofagia | 23 | 9.7 | 6 | 26.1 |
| Hemoptisis | 8 | 3.4 | 1 | 12.5 |
| Exantema | 3 | 1.3 | 0 | 0 |
| **Total** |  | **238** | **100** | **61** | **25.6** |

1: Los porcentajes se calcularon sobre el total de la muestra (238).

2: Porcentajes de defunciones para cada categoría de las variables basales.
